# Supplementary material for: A Geobacter strain isolated from rice paddy soil with higher bioelectricity generation capability in comparison to Geobacter sulfurreducens PCA
Source: Royal Society of Chemistry journal article supplement (doi:10.1039/c5ra06211j), 2015-01-01
Supplement: c5ra06211j1.pdf [file c5ra06211j1.pdf]

## Supporting material

### 1 2 **A *Geobacter* Strain Isolated from Rice Paddy Soil with Higher Bioelectricity** 3 **Generation Capability in Comparison to *Geobacter sulfurreducens* PCA**

4 Dandan Deng, Yichi Zhang, Ying Liu\*

5 College of Life Sciences, Northwest A&F University, Yangling, Shaanxi, 712100, PR China

6

7

8

9

10

11

12

13

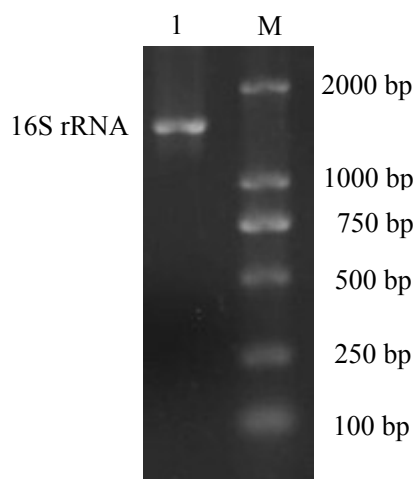

14 Figure S1 PCR amplification of bacterial genomic DNA isolated from Fe-soil-culture with 16S rRNA gene. Lane  
15 M, DNA size marker; Lane 1, the genomic DNA from strain D-8

16

17

18

19

20

21

22

---

\* Corresponding author, Current address: College of Life Sciences, Northwest A&F University, No. 22 Xiong Road, Yangling, Shaanxi Province, 712100, PR China, E-mail: [lydiayliu@yahoo.com](mailto:lydiayliu@yahoo.com)

23  
24  
25  
26  
27  
28  
29

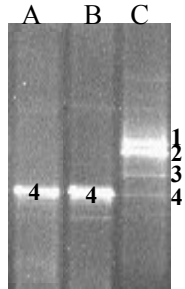

30 Figure S2 Fig. 4 DGGE analysis of the amplified V3 variable region of bacterial 16S rRNA genes from the  
31 different cultures: lane A, cloned 16S rRNA genes of strain D-8; lane B, selected after Fe(III)-oxide;  
32 selected using Fe(III)-oxide reduction.

33  
34  
35  
36  
37  
38

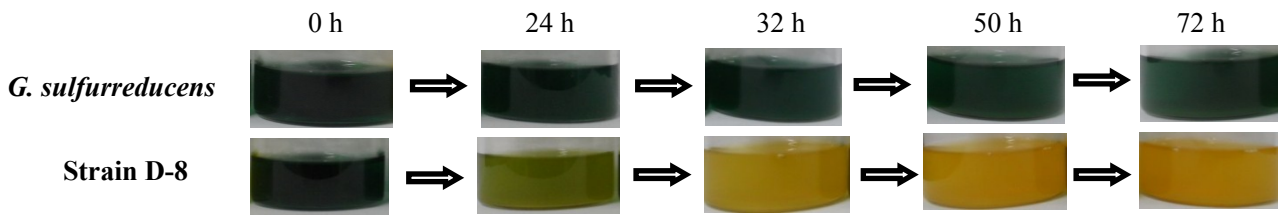

39 Figure S3 Glycolytic tests of *G. sulfurreducens* and strain D-8 in medium containing BTB as indicator.

40  
41  
42  
43  
44

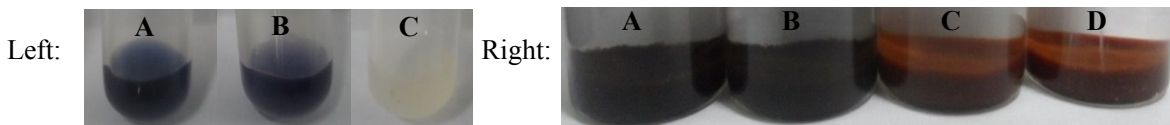

45 Figure S4 Left: Amylohydrolysis of *G. sulfurreducens* and strain D-8 with incubation for 60 h, (A) controlled exp.,

46 (B) *G. sulfurreducens* and (C) strain D-8;

47 Right: Cultures incubation for more than 5 days with medium containing amorphous ferric oxyhydroxide (FeOOH)

48 inoculated 10% strain D-8 was pumped by filtered air for 10 min (A) and 5 min (B), medium containing amorphous

49 ferric oxyhydroxide (FeOOH) inoculated 10% *G. sulfurreducens* was pumped by filtered air for 10 min (C) and 5

50 min (D).
